# Supplementary material
Source: bioRxiv or medRxiv preprint supplement (https://www.biorxiv.org/highwire/filestream/8324/field_highwire_adjunct_files/0/030965-1.pdf)
Supplement: Supplementary file [file 030965-1.pdf]

# Assisted Reproduction Interrupt the Placental Lipid Metabolism Resulted to Genomic Imprinting Aberration linked to Slow Fetal Growth

Yubao Wei<sup>1,2</sup>, Shuqiang Chen<sup>1,2</sup>, Xiuying Huang<sup>1</sup>, Sin Man Lam<sup>1</sup>, Guanghou Shui<sup>1</sup>, Fangzhen Sun<sup>1\*</sup>

1 State Key Laboratory of Molecular Development Biology, Institute of Genetics and Developmental Biology, Chinese Academy of Science, Beijing , China 100101, 2 University of Chinese Academy of Sciences, Beijing , China, 100039

## Supporting information

**Figure S1** Methylation status of CpG sites of *Gnas* and *Grb10*.

**Table S1** The quantities of 15 lipid classes at E18.5, E14.5

**Table S2** qPCR primer sequences for the genes related to lipid uptake, transport and metabolism.

**Table S3** qPCR primer sequences for the genes related to lipid metabolism regulation.

**Table S4** qPCR primer sequences for the imprinted genes.

**Table S5** Sequenom MassArray primer for *Gnas* and *Grb10*

**Table S6** qPCR primer sequences for *DNMTs* and *Tets*.

**Figure S1** Methylation status of CpG sites of *Gnas*, *Grb10*.

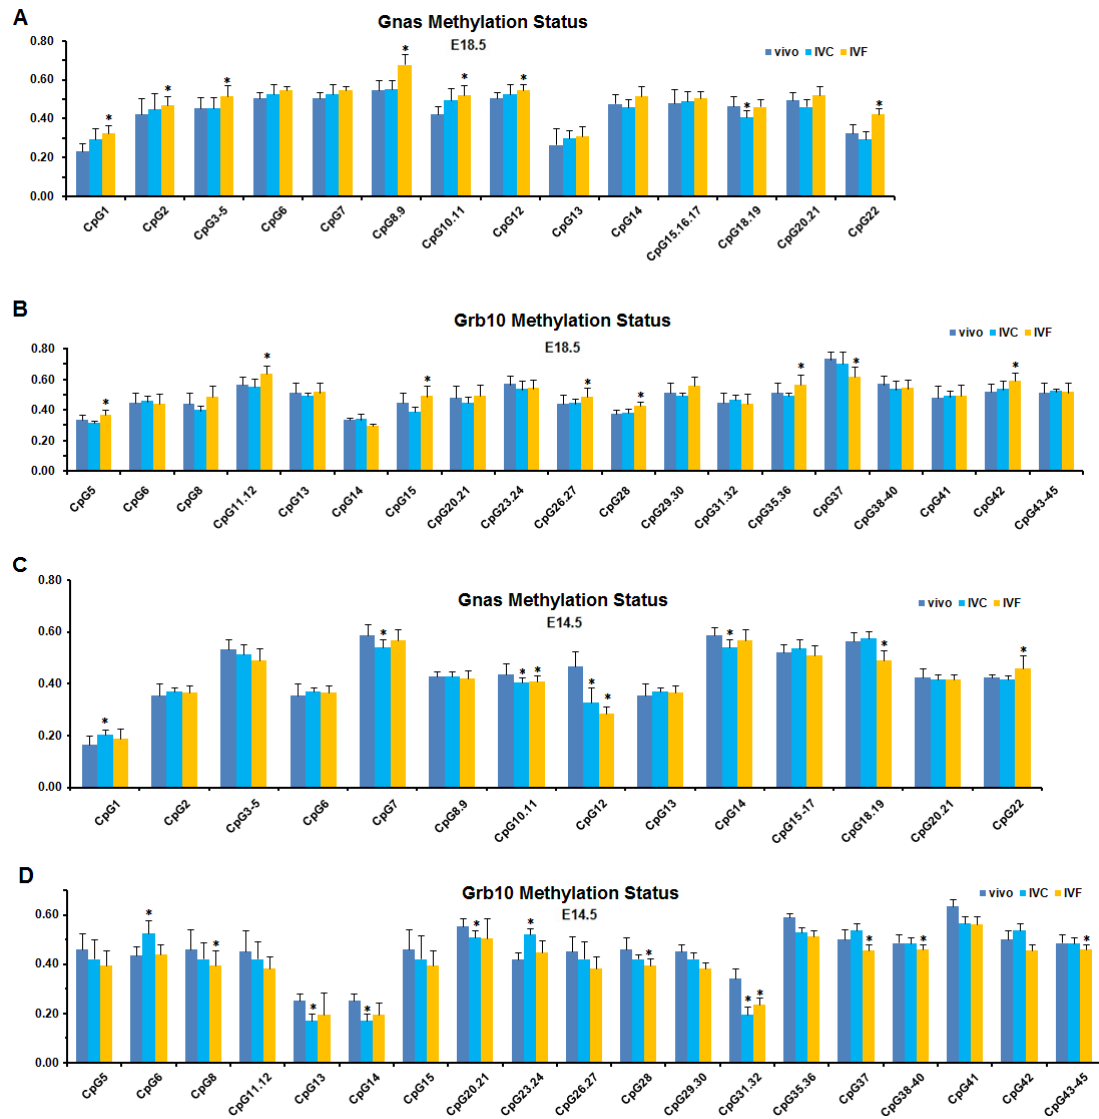

**Table S1** The quantities of 15 lipid classes.

| E18.5 placenta               | Average content (uM/g) |        |        | Ratio of changes |          |
|------------------------------|------------------------|--------|--------|------------------|----------|
|                              | in vivo                | IVC    | IVF    | IVC/vivo         | IVF/vivo |
| <b>Acylglycerols</b>         |                        |        |        |                  |          |
| TAG (triacylglycerides)      | 4.481                  | 3.563  | 9.256  | 0.795            | 2.066    |
| DAG (diacylglycerol)         | 0.278                  | 0.255  | 0.351  | 0.917            | 1.263    |
| <b>Cholesterols</b>          |                        |        |        |                  |          |
| CE (cholesteryl esters)      | 4.080                  | 3.372  | 10.419 | 0.826            | 2.554    |
| Free Cho ( free cholesterol) | 29.695                 | 22.617 | 48.092 | 0.762            | 1.620    |

**Sphingolipids**

|                              |       |       |        |       |       |
|------------------------------|-------|-------|--------|-------|-------|
| Cer (ceramide)               | 0.377 | 0.337 | 0.803  | 0.893 | 2.128 |
| GluCer (Glucosylceramide)    | 0.218 | 0.262 | 0.359  | 1.203 | 1.649 |
| SM (sphingomyelin)           | 7.000 | 6.342 | 12.594 | 0.906 | 1.799 |
| GM3 (anglioside mannoside 3) | 0.062 | 0.118 | 0.168  | 1.887 | 2.688 |

**Phospholipids**

|                                 |        |        |        |       |       |
|---------------------------------|--------|--------|--------|-------|-------|
| PC (phosphatidylcholine)        | 26.105 | 22.297 | 36.031 | 0.854 | 1.380 |
| PE (phosphatidylethanolamine)   | 4.983  | 4.780  | 7.108  | 0.959 | 1.427 |
| PG (Phosphatidylglycerol)       | 0.187  | 0.176  | 0.393  | 0.942 | 2.104 |
| PI (phosphatidylinositol)       | 4.735  | 4.530  | 5.831  | 0.957 | 1.231 |
| PS (phosphatidylserine)         | 4.739  | 3.897  | 7.103  | 0.822 | 1.499 |
| LBPA (Lysobisphosphatidic acid) | 0.058  | 0.037  | 0.079  | 0.641 | 1.372 |
| LPC (lysophosphatidylcholine)   | 0.526  | 0.476  | 0.698  | 0.904 | 1.326 |

| <b>E14.5 placentae</b>          | <b>Average content (uM/g)</b> |            |            | <b>Ratio of changes</b> |                 |
|---------------------------------|-------------------------------|------------|------------|-------------------------|-----------------|
|                                 | <b>in vivo</b>                | <b>IVC</b> | <b>IVF</b> | <b>IVC/vivo</b>         | <b>IVF/vivo</b> |
| <b>Acylglycerols</b>            |                               |            |            |                         |                 |
| TAG (triacylglycerides)         | 14.162                        | 16.976     | 5.901      | 1.199                   | 0.417           |
| DAG (diacylglycerol)            | 0.598                         | 0.546      | 0.249      | 0.913                   | 0.416           |
| <b>Cholesterols</b>             |                               |            |            |                         |                 |
| CE (cholesteryl esters)         | 9.214                         | 9.180      | 4.882      | 0.996                   | 0.530           |
| Free Cho ( free cholesterol)    | 48.677                        | 51.873     | 25.674     | 1.066                   | 0.527           |
| <b>Sphingolipids</b>            |                               |            |            |                         |                 |
| Cer (ceramide)                  | 0.732                         | 0.742      | 0.356      | 1.013                   | 0.487           |
| GluCer (Glucosylceramide)       | 0.770                         | 0.829      | 0.503      | 1.077                   | 0.654           |
| SM (sphingomyelin)              | 10.633                        | 9.895      | 5.514      | 0.931                   | 0.519           |
| GM3 (anglioside mannoside 3)    | 0.260                         | 0.243      | 0.099      | 0.935                   | 0.381           |
| <b>Phospholipids</b>            |                               |            |            |                         |                 |
| PC (phosphatidylcholine)        | 48.050                        | 40.162     | 21.763     | 0.836                   | 0.453           |
| PE (phosphatidylethanolamine)   | 11.414                        | 9.994      | 5.698      | 0.876                   | 0.499           |
| PG (Phosphatidylglycerol)       | 0.344                         | 0.400      | 0.213      | 1.163                   | 0.619           |
| PI (phosphatidylinositol)       | 8.313                         | 7.598      | 4.659      | 0.914                   | 0.560           |
| PS (phosphatidylserine)         | 7.453                         | 5.837      | 4.054      | 0.783                   | 0.544           |
| LBPA (Lysobisphosphatidic acid) | 0.116                         | 0.078      | 0.040      | 0.668                   | 0.348           |
| LPC (lysophosphatidylcholine)   | 0.791                         | 1.572      | 0.556      | 1.988                   | 0.703           |

**Table S2** qPCR primer sequences for the genes related to lipid uptake, transport and metabolism

| <b>Genes</b>   | <b>Forward primers</b>  | <b>Reverse primers</b>  | <b>Gene ID</b> |
|----------------|-------------------------|-------------------------|----------------|
| <i>ABCG1</i>   | CTTTCCTACTCTGTACCCGAGG  | CGGGGCATTCCATTGATAAGG   | 11307          |
| <i>Acaca</i>   | CCGATTCATAATTGGGTCTGTGT | CCATCCTGTAAGCCAGAGATCC  | NM_133360      |
| <i>Acly</i>    | CAGCCAAGGCAATTCAGAGC    | CTCGACGTTTGATTAAGTGGTCT | NM_134037      |
| <i>ApoE</i>    | CTGACAGGATGCCTAGCCG     | CGCAGGTAATCCCAGAAGC     | 11816          |
| <i>Lrp8</i>    | TCCTGCCGAGAAGTTAAGCTG   | AAGAACGCAAGTCCCATCCC    | 16975          |
| <i>Actb</i>    | GGCTGTATTCCCCTCCATCG    | CCAGTTGGTAACAATGCCATGT  | 11461          |
| <i>AgRP</i>    | ATGCTGACTGCAATGTTGCTG   | CAGACTTAGACCTGGGAAGTCT  | 11604          |
| <i>Apoc1</i>   | TCCTGTCCTGATTGTGGTCGT   | CCAAAGTGTTCCCAAAGTCTCT  | 11812          |
| <i>CD31</i>    | ACGCTGGTGCTCTATGCAAG    | TCAGTTGCTGCCCATTCATCA   | 18613          |
| <i>Cpt1a</i>   | GGGTCGAAAGCCCATGTTGTA   | CAGTGCTGTCATGCGTTGGA    | NM_013495      |
| <i>Cpt1b</i>   | GCACACCAGGCAGTAGCTTT    | CAGGAGTTGATTCCAGACAGGTA | NM_009948      |
| <i>CtPS1</i>   | GCAGTGTTGGCACAATACTTA   | GCGCTCCTTGTTAATGACGTA   | 51797          |
| <i>Cat</i>     | AGCGACCAGATGAAGCAGTG    | TCCGCTCTCTGTCAAAGTGTG   | 12359          |
| <i>EL</i>      | CTTCCAGTGACAGACTCCA     | GGGTGTCCCACTGTTATTG     | NM_010720.3    |
| <i>FASN</i>    | GGAGGTGGTGATAGCCGGTAT   | TGGGTAATCCATAGAGCCCAG   | NM_007988      |
| <i>Slc27a1</i> | CGCTTTCTGCGTATCGTCTG    | GATGCACGGGATCGTGTCT     | 26457          |
| <i>Slc27a4</i> | ACTGTTCTCCAAGCTAGTGCT   | GATGAAGACCCGGATGAAACG   | 26569          |
| <i>Slc2a1</i>  | CAGTTCGGCTATAAACTGGTG   | GCCCCGACAGAGAAGATG      | 20525          |
| <i>Gpx1</i>    | AGTCCACCGTGTATGCCTTCT   | GAGACGCGACATTCTCAATGA   | 14775          |
| <i>GPIHBP1</i> | AGCAGGGACAGAGCACCTCT    | AGACGAGCGTGATGCAGAAG    | NM_026730.1    |
| <i>Hmgcs2</i>  | TCGAGGGCATAGATACCACCAAC | CCGCGCTTCAGTTCAGTGTC    | NM_008256      |
| <i>Hnf4a</i>   | CACGCGGAGGTCAAGCTAC     | CCCAGAGATGGGAGAGGTGAT   | 15378          |
| <i>HSL</i>     | GCTGGGCTGTCAAGCACTGT    | GTAAGTGGGTAGGCTGCCAT    | NM_010719.5    |
| <i>LDLR</i>    | TGACTCAGACGAACAAGGCTG   | ATCTAGGCAATCTCGGTCTCC   | 16835          |

|                |                          |                          |                |
|----------------|--------------------------|--------------------------|----------------|
| <i>LIPIN1</i>  | CATGCTTCGGAAAGTCCTTCA    | GGTTATTCTTTGGCGTCAACCT   | 14245          |
| <i>LIPIN3</i>  | CAAACCTCGTGGTAAAAATCAAC  | CCACAGTGCTCTCAGGTAAGT    | 64899          |
| <i>LPL</i>     | GGGAGTTTGGCTCCAGAGTTT    | TGTGTCTTCAGGGGTCCTTAG    | 16956          |
| <i>Sorl1</i>   | AGCAGGAGGGAGTCGAGAC      | GTTCTAGCCGGAGATCGC       | 20660          |
| <i>LRP 1</i>   | ACAAGGACTGTACCGATGGC     | GGTACTCACACTCAGGGGA      | NM_008512.2    |
| <i>LRP2</i>    | GTTCCGGTTGATGTTCTGGAC    | TGCATCGTTTATGATGAGTCTCC  | 14725          |
| <i>Ldlr</i>    | GGATGTCGACTGTGTTGACG     | GCACACTGGAATTCATCAGG     | NM_010700.2    |
| <i>Lepr</i>    | GTCTTCGGGGATGTGAATGTC    | ACCTAAGGGTGGATCGGGTTT    | 16847          |
| <i>Lrp1</i>    | ACTATGGATGCCCTAAAACCTTG  | GCAATCTCTTTACCGTCACA     | 16971          |
| <i>PPARd</i>   | CAAGTGGGGTCAGTCATGGAA    | GCTGGAAGGAAGCGTGTGTT     | 19015          |
| <i>PPARa</i>   | AGAGCCCCATCTGTCCTCTC     | ACTGGTAGTCTGCAAACCAAA    | 19013          |
| <i>PPARg</i>   | TCGCTGATGCACTGCCTATG     | GAGAGGTCCACAGAGCTGATT    | 19016          |
| <i>Plin2</i>   | GACCTTGTGTCCTCCGCTTAT    | CAACCGCAATTTGTGGCTC      | 11520          |
| <i>Prdx2</i>   | GGTAACGCGCAAATCGGAAAG    | TCCAGTGGGTAGAAAAAGAGGT   | 21672          |
| <i>Pla2g10</i> | GTGCAGGTGTGACGAGGAG      | CACTTGGGAGAGTCCTTCTCA    | 26565          |
| <i>Pla2g15</i> | GGGTAACCAGTTGGAAGCAAA    | TTGTCAATCCAGCAGTCAATGAT  | 192654         |
| <i>RBP</i>     | GGAGAACTTCGAACAAGGCTC    | CTGCACACACTTCCCAGTTG     | NM_001159487.1 |
| <i>Rbp1</i>    | CTGAGCAATGAGAATTTGAGGA   | GCGGTCGTCTATGCCTGTC      | 19659          |
| <i>Sepp1</i>   | AGCTCTGCTTGTTACAAAGCC    | CAGGTCTTCCAATCTGGATGC    | 20363          |
| <i>Sc4mol</i>  | AAACAAAAGTGTGGCGTGTTT    | AAGCATTCTTAAAGGGCTCCTG   | 66234          |
| <i>VLDLR</i>   | GGCAGCAGGCAATGCAATG      | GGGCTCGTCACTCCAGTCT      | 22359          |
| <i>UGT1A1</i>  | TGACCACGCGCAGCAGAAAAGAAT | TGACCACGCGCAGCAGAAAAGAAT | 394431         |
| <i>UGT1A2</i>  | TGCCCTTCGAGGAATCTCAGG    | CTCCCGCACAACATCCCTCATG   | [1]            |
| <i>UGT1A6</i>  | CTGGCTGATGGTGGCTGACTG    | ACTGAGGCCCAAAGCACTAGGAA  | [1]            |
| <i>Pgf</i>     | TCTGCTGGGAACAACTCAACA    | GTGAGACACCTCATCAGGGTAT   | 18654          |
| <i>Bcl2</i>    | ATGCCTTTGTGGAATATATGGC   | GGTATGCACCCAGAGTGATGC    | 12043          |
| <i>Bax</i>     | TGAAGACAGGGGCCTTTTTG     | AATTCGCCGGAGACACTCG      | 12028          |
| <i>GSR</i>     | GACACCTCTTCCTTCGACTACC   | CCCAGCTTGTGACTCTCCAC     | 14782          |

|              |                         |                          |       |
|--------------|-------------------------|--------------------------|-------|
| <i>Gsx1</i>  | CTTCCCTCCCTTCGGATCG     | GTCCACAGAGATGCAGTGAAA    | 14842 |
| <i>SOD1</i>  | AACCAGTTGTGTTGTCAGGAC   | CCACCATGTTTCTTAGAGTGAGG  | 20655 |
| <i>casp3</i> | TGGTGATGAAGGGGTCATTTATG | TTCGGCTTTCCAGTCAGACTC    | 12367 |
| <i>Casp8</i> | TGCTTGACTACATCCCACAC    | TGCAGTCTAGGAAGTTGACCA    | 12370 |
| <i>casp9</i> | GACGCTCTGCTGAGTCGAG     | GGTCTAGGGGTTAACAGCCTC    | 12371 |
| <i>Cytb</i>  | AACATACGAAAAACACACCCATT | AGTGTATGGCTAAGAAAAGACCTG | [2]   |
| <i>COXII</i> | ACGAAATCAACAACCCCGTA    | CTAGGGAGGGGACTGCTCAT     | [2]   |
| <i>Gapdh</i> | CATGGCCTTCCGTGTTCCCTA   | TGTCATCATACTTGGCAGGTTT   | [2]   |
| <i>HPRT</i>  | CAGGCCAGACTTTGTTGGAT    | TTGCGCTCATCTTAGGCTTT     | [2]   |

1 Wassef L, and Quadro L. (2011) Uptake of Dietary Retinoids at the Maternal-Fetal Barrier J Biol Chem 286: 32198-32207.

2 Collier AC, Milam KA, Rougée LR, Sugawara A, Yamauchi Y, et al. (2012) Upregulation of Ugt1a genes in placentas and fetal livers. Placenta 33: 77-80.

**Table S3** qPCR primer sequences for the genes related to lipid metabolism regulation

| <b>Genes</b> | <b>Forward primers</b>  | <b>Reverse primers</b>  | <b>Gene ID</b> |
|--------------|-------------------------|-------------------------|----------------|
| <i>CD36</i>  | ATGGGCTGTGATCGGAACTG    | GTCTTCCCAATAAGCATGTCTCC | 12491          |
| <i>Dgkk</i>  | CCTGGCTCTACATCAGTAACTGC | AATTTGAGGAGTGACCCAACAG  | 331374         |
| <i>Dkk1</i>  | CTCATCAATTCCAACGCGATCA  | GCCCTCATAGAGAACTCCCG    | 13380          |
| <i>Hmox1</i> | AAGCCGAGAATGCTGAGTTCA   | GCCGTGTAGATATGGTACAAGGA | 15368          |
| <i>Pthlh</i> | CATCAGCTACTGCATGACAAGG  | GGTGGTTTTTGGTGTGGGAG    | 19227          |
| <i>Mtor</i>  | ACCGGCACACATTTGAAGAAG   | CTCGTTGAGGATCAGCAAGG    | 56717          |
| <i>Pgf</i>   | TCTGCTGGGAACAACACTCAACA | GTGAGACACCTCATCAGGGTAT  | 18654          |
| <i>P53</i>   | GTAGGAAGGCGCGTGGTAG     | CAGTTACAGGAACCCCGAG     | [1]            |
| <i>SRBI</i>  | TCCCTCATCAAGCAGCAGGT    | TTCCACATCCCGAAGGACA     | NM_016741.1    |
| <i>Stat3</i> | AGCTGGACACACGCTACCT     | AGGAATCGGCTATATTGCTGGT  | 20848          |
| <i>Stat1</i> | CGGAGTCGGAGGCCCTAAT     | ACAGCAGGTGCTTCTTAATGAG  | 20846          |
| <i>TNF</i>   | GACGTGGAAGTGGCAGAAGAG   | TTGGTGGTTTTGTGAGTGTGAG  | 21926          |

1 Collier AC, Milam KA, Rougée LR, Sugawara A, Yamauchi Y, et al. (2012) Upregulation

of Ugt1a genes in placentas and fetal livers. Placenta 33: 77-80.

**Table S4** qPCR primer sequences for the imprinted genes.

| <b>Genes</b>   | <b>Forward primers</b> | <b>Reverse primers</b>   | <b>GeneID</b> |
|----------------|------------------------|--------------------------|---------------|
| <i>GNAS</i>    | CAGAGCCTCCATTGGGGTC    | GCTTCTCGCTCAACTGGGG      | 14683         |
| <i>Peg3</i>    | TCATGCACACTAGGGAGAACC  | GGCAGCACTCCTACTGAAGG     | 18616         |
| <i>Dlk1</i>    | AGTGCGAAACCTGGGTGTC    | GCCTCCTTGTGAAAGTGGTCA    | 13386         |
| <i>Cobl</i>    | CTTAGGGGGAAGCTATGGACT  | ACACATCCCTGTCATAACACCT   | 12808         |
| <i>Commd1</i>  | CTGCACAGCCAACCTCTATCCG | GCCTCTAACTGGTTGAAATCCA   | 17846         |
| <i>Copg2</i>   | GAGGAGTCTGGTAGTGGTTCC  | TGTTCAACCCTGGTTGAGTAAGT  | 54160         |
| <i>Ddc</i>     | TAGCTGACTATCTGGATGGCAT | GTCCTCGTATGTTTCTGGCTC    | 13195         |
| <i>Esx1</i>    | TTGGAGGGAGCAGACTACCAG  | CCAAAAGTCGGAGTAGAAAGTTGT | 13984         |
| <i>Gab1</i>    | GAAGTTGAAGCGTTATGCGTG  | AGAAAATCCGGTCGATGGTGT    | 14388         |
| <i>Grb10</i>   | TGCACCACTTCTTGAGGATG   | ACCAGTGAGCTCCGGAAATG     | 14783         |
| <i>Igf2p0</i>  | GCATCCCCGGTCTCTTTAT    | GCTCTGGCTGGACGAGAAGT     | 16002         |
| <i>Impact</i>  | GTGAAGAAATCGAAGCAATGGC | GGTACTCACTTGCAACATCA     | 16210         |
| <i>Klf14</i>   | CTCCGTGTGCCTCACTAGC    | CAGGCGCATCCAGGATAGC      | 619665        |
| <i>Meg3</i>    | TCCTCACCTCCAATTTCCCT   | GAGCGAGAGCCGTTGATG       | 17263         |
| <i>Nap115</i>  | GCCGAGGACGAGGTAATGG    | CATTTACGGAATTGGGCAAG     | 58243         |
| <i>Peg1</i>    | GTGGTGGGTCCAAGTAGGG    | AAGCACAACTATCTCAGGGCT    | 17294         |
| <i>Peg10</i>   | GTGGCATCGCAGAGGAAT     | GTGAGAGGGGCTTCACTCC      | 170676        |
| <i>Pon2</i>    | GCTCTGAGTTTGCTGGGCAT   | GGCAGTTTGAAGGTCTACAGAT   | 330260        |
| <i>Rtl1</i>    | CCATGAGTCGAGCTTTGGTTC  | TCCGGTTTGAATCATAGCTTG    | 353326        |
| <i>Sfmbt2</i>  | GGCCAATTCTTACCCTCTGAC  | TCTCAATAGGCACTGGGGATAAT  | 353282        |
| <i>Slc22a2</i> | CCAGTGCATGAGGTATGAGGT  | CTGAAACAGGTCCAGCATCCA    | 20518         |
| <i>Slc22a3</i> | CAGCCCGACTACTATTGGTGT  | TGAGCTGGTATTAGTGGCTTCC   | 20519         |
| <i>Usp29</i>   | TCCGCAGCACAAACAGGAG    | CTCACCCTAACCCTACGCC      | 57775         |
| <i>Zdbf2</i>   | ACTCTGATGGAACGCTTTTTGC | ACCACCACCACTTCAGGTGA     | 73884         |

|              |                         |                         |             |
|--------------|-------------------------|-------------------------|-------------|
| <i>Zim1</i>  | GGAGAACTACGAGAACCTGATCT | TGTCTTAGAATTGTCTGGCTTCC | NM_011769.4 |
| <i>Zrsr1</i> | CAGACCGCGATTCTGAGAAA    | CTCTGCAAGTTCTTCGTTAGCA  | 22183       |

**Table S5** Sequenom MassArray primer for *Gnas*, *Grb10*

***GNAS*** (NC\_000068.7 from: 174120497 to 17412110)

Target region: 351-546 length: 196 bp

5' primer: aggaagagagTGGATATGGTTATTTTGATAGGGG

3' primer: cagtaatacgcactcactataggagaaggctCTAAACACAAACCCACACCTAC

***Grb10*** (GenBank: AL663087.14)

Target region: 65461-66250 length: 790 bp

5' primer: aggaagagag GGGTTTTGGAGTTTAGAGGAG

3' primer: cagtaatacgcactcactataggagaaggctAAAATTAACCCCTTACTAAAATAAC

**Table S6** qPCR primer sequences for *DNMTs* and *Tets*.

| <b>Genes</b>  | <b>Forward primers</b>  | <b>Reverse primers</b> |
|---------------|-------------------------|------------------------|
| <i>DNMT1</i>  | AAGAATGGTGTGTCTACCGAC   | CATCCAGGTTGCTCCCCTTG   |
| <i>DNMT3A</i> | GAGGGAAGTCTGAGACCCAC    | CTGGAAGGTGAGTCTTGGCA   |
| <i>DNMT3B</i> | AGCGGGTATGAGGAGTGCAT    | GGGAGCATCCTTCGTGTCTG   |
| <i>DNMT3L</i> | GCTCTAAGACCCTTGAAACCTTG | GTCGGTTCACCTTGACTTCGTA |
| <i>Tet1</i>   | ACACAGTGGTGCTAATGCAG    | AGCATGAACGGGAGAATCGG   |
| <i>Tet2</i>   | AGAGAAGACAATCGAGAAGTCGG | CCTCCGTAATCCCAAACCTCAT |
| <i>Tet3</i>   | TGCGATTGTGTCGAACAAATAGT | TCCATACCGATCCTCCATGAG  |
